1

2 **Global success in oyster reef restoration despite ongoing recovery debt.**

3

4 Deevesh A. Hemraj<sup>1</sup>, Melanie J. Bishop<sup>2</sup>, Boze Hancock<sup>3</sup>, Jay J. Minuti<sup>1</sup>, Ruth H. Thurstan<sup>4</sup>,  
5 Philine S.E. Zu Ermgassen<sup>5</sup>, and Bayden D. Russell<sup>1\*</sup>

6

7 <sup>1</sup>The Swire Institute of Marine Science and Division for Ecology and Biodiversity, School of  
8 Biological Sciences, The University of Hong Kong, Pokfulam Road, Hong Kong SAR, China.

9 <sup>2</sup>School of Natural Sciences, Macquarie University, Sydney, NSW, Australia

10 <sup>3</sup>The Nature Conservancy, C/O URI Graduate School of Oceanography, 215 South Ferry Rd.,  
11 Narragansett, Rhode Island, USA.

12 <sup>4</sup>Centre for Ecology and Conservation, College of Life and Environmental Sciences, The  
13 University of Exeter, Cornwall, TR10 9FE, United Kingdom.

14 <sup>5</sup>Changing Oceans Group, School of Geosciences, University of Edinburgh, James Hutton Rd,  
15 King's Buildings, Edinburgh EH9 3FE, United Kingdom

16

17 \*Corresponding author: [brussell@hku.hk](mailto:brussell@hku.hk)

18

19 **Key words:** ecosystem recovery, restoration, degraded habitat, alternative substrate

20 **Abstract**

21 Habitat destruction and biodiversity loss from exploitation of ecosystems have led to increased  
22 restoration and conservation efforts worldwide. Disturbed ecosystems accumulate a recovery  
23 debt – the accumulated loss of ecosystem services - and quantifying this debt presents a  
24 valuable tool to develop better ecosystem restoration practices. Here, we quantified the ongoing  
25 recovery debt following structural restoration of oyster habitats, one of the most degraded  
26 marine ecosystems worldwide. We found that whilst restoration initiates a rapid increase in  
27 biodiversity and abundance of 2- to 5-fold relative to unrestored habitat, recovery rate  
28 decreases substantially within a few years post-restoration and accumulated global recovery  
29 debt persists at >35% per annum. Therefore, while efficient restoration methods will produce  
30 enhanced recovery success and minimise recovery debt, potential future coastal development  
31 should be weighed up against not just the instantaneous damage to ecosystem functions and  
32 services but also the potential for generational loss of services and long-term recovery.

33

## 34 **Introduction**

35 Exploitation and disturbance of ecosystems in the Anthropocene has led to severe degradation  
36 of natural biomes and loss of biodiversity<sup>1,2,3</sup>. Consequently, investment in conservation and  
37 restoration efforts have increased worldwide<sup>4,5,6,7</sup>, especially as a strategy to restore ecosystem  
38 services<sup>8</sup>. Whilst the cost-benefit ratio of restoration is often justified as ecosystem recovery  
39 that yields sufficient benefits to human prosperity<sup>9</sup>, recovery of ecosystems back to a reference  
40 state in terms of biodiversity and ecosystem functions and services<sup>10</sup> often requires  
41 decades<sup>11,12,13</sup>. Where damaged ecosystems provide reduced function or support reduced  
42 biodiversity relative to the historical “natural state” (reference/pristine condition), a recovery  
43 debt is accumulated<sup>13</sup> (Fig. 1). While recovery debt has been estimated in ecosystems that  
44 largely only require natural regeneration following the removal of persistent disturbances<sup>13</sup>, the  
45 recovery debt and recovery pathway of marine habitats requiring active intervention, including  
46 structural restoration, remains undetermined (Fig. 1).

47

48 A major part of the accumulated debt in recovering ecosystems can be considered as services  
49 foregone<sup>14</sup> (future services had there not been damage). Actions which increase the rate of  
50 system recovery (e.g., habitat restoration) will theoretically increase both the rate of recovery  
51 and the potential for an ecosystem to recover to its maximum capacity, minimise the services  
52 foregone, and thus reduce recovery debt. Therefore, utilising the best performing restoration  
53 methods to rapidly boost recovery of ecosystems may minimize the accumulated recovery debt  
54 and at least partially offset the ongoing damage associated with current activities (e.g., coastal  
55 development).

56

57 Oyster habitats are one of the most anthropogenically impacted coastal habitats worldwide. At  
58 least 85% of oyster habitats have been lost globally, predominantly as a consequence of

59 historical overharvest using destructive fishing practices, but also due to more recent effects of  
60 coastal urbanisation, including declining water quality and introduced disease issues<sup>15,16</sup>.  
61 Destructive dredge harvest not only removed live oysters and their biological functions, but  
62 also the remnant dead oyster shells that provide structural complexity (vertical relief and size)  
63 and substrate for oyster settlement<sup>15</sup>. As such, only a handful of sites remain globally where  
64 oyster habitats remain in their ‘natural state’ (mainly in the East and Gulf Coasts of the USA).  
65 Given the biogenic reef building nature of oyster habitats, and a life history that leaves them  
66 vulnerable to allee effects, natural recovery is unlikely given the loss of structural habitat which  
67 is essential for oyster settlement. Therefore, intensive restoration efforts of oyster habitats have  
68 led to large capital investment in various methods, all aiming to increase the spatial area of  
69 oyster habitat, their functioning, and ecosystem services<sup>17,18,19,20,21,22</sup>.

70

71 Restoration of oyster habitats typically includes remediation of environmental conditions,  
72 substrate provision and/or restocking with juvenile and/or adult oysters<sup>23</sup>. Key considerations  
73 in substrate provision are the type of material used (e.g., recycled shell vs. artificial materials  
74 such as concrete blocks) as well as its spatial arrangement<sup>24</sup>. While oyster habitats naturally  
75 accrete on oyster shell, the availability of oyster shells (from aquaculture, or shell recycling  
76 program) is generally limiting, meaning that different substrate types have been tested as an  
77 alternative in oyster habitat restoration studies. Although a range of factors associated with the  
78 spatial arrangement of substrate (e.g., patch size, fragmentation) can influence oyster  
79 establishment and ecosystem service provision<sup>24</sup>, vertical relief is considered particularly  
80 important as it can influence oyster habitat growth by determining water flow, dissolved  
81 oxygen concentrations, and reduce smothering from the accumulation of sediment.

82

83 The exploitation and removal of oyster habitats largely took place during, or prior to, the 19<sup>th</sup>  
84 century<sup>25,26,27</sup>. While scarce documentation exists which depicts the pristine or pre-impact  
85 condition of oyster reefs, it is widely accepted that our current understanding is hampered by a  
86 shifted baseline. Recovery debt following structural restoration of oyster habitats (e.g., Fig. 1)  
87 can therefore currently only be assessed relative to remnant habitat (Box 1). Assessment of the  
88 current recovery can be used to identify the extent to which restoration efforts can mitigate  
89 contemporary damage (e.g., with coastal development), to improve the incorporation of  
90 recovery debt in restoration planning, environmental offsets, and in mitigation measures. While  
91 oyster habitat restoration tends to yield some positive results in terms of recovery towards a  
92 reference state, the effectiveness of varying methods of restoration in terms of maximum  
93 habitat recovery remain unclear. Here, we calculated the recovery debt for restored oyster  
94 habitat globally and undertook a meta-analysis of oyster habitat restoration worldwide to: (1)  
95 calculate restoration associated recovery of biodiversity and abundance of resident and  
96 transient fish and invertebrates in oyster habitats; and (2) identify the methods for oyster habitat  
97 restoration which most successfully reduced recovery debt. Overall, we demonstrate that  
98 restoration is effective at rapidly mitigating damage to oyster habitat ecosystems, but while the  
99 accumulated debt is variable among different measures of recovery, debt continues to  
100 accumulate.

101

### **Box 1: Key Terminologies**

**Oyster habitat:** a patch of oysters large enough to form three-dimensional complex habitat. Similar terminology used in the literature include ‘oyster bed’ or ‘oyster reef’.

**Recovery debt:** accumulated loss of ecosystem structure and functions between the point of habitat damage and “full recovery” to a reference state.

**Restored habitat:** an oyster habitat patch that has been actively restored, for example, by the addition of substrate (e.g., oyster shell, limestone, concrete) and/or the provision of live oysters

**Remnant habitat:** oyster habitats that have not been destroyed or degraded (e.g., by extraction of oysters) and have persisted over centuries, or those that have historically been damaged but have since fully recovered through natural processes. These habitats are used as reference habitat for calculating recovery debt of restored reefs.

**Unrestored habitat:** an area where oysters historically were present but are presently degraded and are not being restored. These habitats are generally areas of bare sediment where oyster reefs previously existed.

102

## 103 **Results**

### 104 **Oyster habitat recovery post restoration**

105 The analysis of monitoring data for 20 restored oyster habitats, obtained over an average of  
106 four years post restoration (Fig. 2a, b), revealed that the restored habitats had an annual average  
107 of 36.08% ( $\pm 5.58$  SE) lower species diversity of fish and invertebrates than remnant habitats.

108 While four restoration sites recovered well in terms of diversity within three to four years post  
109 restoration ( $RDr < 10\%$ ), all remaining sites had a recovery debt of  $>20\%$  (Fig. 2). Total  
110 abundance of fish and invertebrates recovered better than diversity, having a mean recovery  
111 debt of 24.37% per annum ( $\pm 9.28$  SE), over an average monitoring period of 3 years. In  
112 contrast to diversity, fish, and invertebrate abundance at 5 out of 20 restored habitats had fully  
113 offset the recovery debt (negative recovery debt) after two and a half years, suggesting  
114 complete recovery and even higher fish and invertebrate abundance compared to remnant  
115 habitats. It must be noted, however, that abundance does not account for shifts in relative

116 abundance among species compared to remnant habitats and does not discriminate between  
117 attraction and production.

118

119 Over the longer-term, neither diversity nor abundance showed a consistent relationship  
120 between estimated recovery debt and time (years) since implementation of structural  
121 restoration (Fig. 2;  $r^2 = 0.029$ ,  $P = 0.458$ ,  $r^2 = 0.057$ ,  $P = 0.315$ , respectively). However, during  
122 the first 4 years, there was substantial decrease in recovery debt in terms of species diversity  
123 (slope:  $-22.849$ ,  $r^2: 0.4962$ ,  $P = 0.0054$ ). Annual recovery rates were high in the first two to  
124 four years but then decreased (Fig. 3). Overall, with a few exceptions, restored oyster habitats  
125 tended to recover towards a reference state (Fig. 3; percentage recovery rate =  $27.05 \pm 4.07$  SE  
126 and  $90.16 \pm 32.16$  SE for diversity and abundance, respectively) though there was no indication  
127 as to when, or if, the habitats would reach “full recovery” (matching reference habitats).

128

### 129 **Difference in diversity and abundance between restored and unrestored habitats**

130 The calculated effect sizes (lnRR) indicated that compared to unrestored habitats (areas that  
131 have been left in a degraded state for decades (generally as bare sediment), restored habitats  
132 had an overall greater nekton abundance, ( $\delta = 1.117 \pm 0.309$ ,  $P < 0.001$ ) (see Supplementary  
133 File 2 for all meta-analysis results). Invertebrate abundance displayed a larger effect size  
134 between restored and unrestored habitats than fish abundance (93.5% increase for fish and  
135 532.2% increase for invertebrates) though both were significant (invertebrates:  $\delta = 0.273 \pm$   
136  $0.264$ ,  $P < 0.042$ ; fish  $\delta = 1.294 \pm 0.48$ ,  $P < 0.001$ ; Fig. 4a, b). The effect size for abundance  
137 was greatest in the first year of habitat restoration, and overall displayed a negative relationship  
138 with time ( $Q = 7.76$ ,  $df = 1$ ,  $P = 0.005$ ; Fig. 4c), suggesting that following a period of rapid  
139 response, recovery slowed. Yet, while the rate of increase in abundance declined over time

140 (Fig. 3), abundance remained consistently higher in restored habitats relative to unrestored sites  
141 (Fig. 4c).

142

### 143 **Oyster habitat restoration method**

144 Overall, more oyster spat recruited to oyster shells than 15 alternate substrata (of which  
145 limestone, concrete, and granite were most common) ( $\delta = -0.472 \pm 0.203$ ,  $P < 0.001$ ; Fig. 5a).

146 Of the alternate substrata, limestone performed the closest to oyster shells with no significant  
147 difference between the two ( $\delta = 0.120 \pm 0.256$ ,  $P = 0.356$ ; Fig. 5a). Granite seemed to attract

148 slightly fewer recruits than oyster shells (7 of 12 studies), but that difference was not significant  
149 ( $\delta = -0.206 \pm 0.657$ ,  $P = 0.540$ ). However, fewer recruits (approximately -37% compared to

150 oyster shell) settled on concrete structures ( $\delta = -0.788 \pm 0.372$ ,  $P < 0.001$ ; Fig. 5a). Restored  
151 habitats which recouped the recovery debt (negative debt) and had the greatest increase in

152 abundance<sup>28,29,30,31</sup> were all constructed with either limestone, oyster shell, or a mix of both  
153 (Fig. 2, 4).

154

155 Vertical relief influenced the density of live oysters whereby oyster habitats more than 20 cm  
156 above the sediment had ~84% higher live oyster density than unrestored bare sediment ( $\delta =$

157  $1.771 \pm 0.474$ ,  $P < 0.001$ ; Fig. 5b) while oyster habitats with vertical relief <20 cm did not  
158 support higher oyster densities than unrestored bare sediment ( $\delta = 0.34 \pm 1.391$ ,  $P < 0.631$ ). No

159 linear relationship was found between relief and oyster density, with increased vertical relief  
160 above 20 cm not contributing to substantially more recruitment ( $Q = 0.0715$ ,  $df = 1$ ,  $P = 0.789$ ,

161 Fig. 5b).

162

163



## 164 **Discussion**

165 Historical exploitation has left the majority of ecosystems formed by oysters in a severely  
166 degraded state for decades to centuries. Our analyses focus on the contemporary debt that is  
167 still accrued following restoration meaning that mitigation of the damage to coastal habitats  
168 will, at the very least, take more direct intervention and time to recover than generally  
169 anticipated. We found that recovery debt tends to decrease during the immediate 2 - 4 years  
170 following restoration across all the locations assessed globally, concomitant with rapid  
171 colonisation of biota – an important result given the increasing investment of resources in  
172 oyster habitat restoration worldwide. The decrease in recovery debt is not, however, maintained  
173 through time and following a rapid initial recovery of faunal assemblages associated with the  
174 restored habitat, reducing the accrued debt, there is a gradual increase in debt as recovery slows  
175 (Fig. 2 and 3). This shift likely reflects an initial rapid accumulation of biodiversity of early  
176 successional species, followed by establishment of competitively dominant taxa that stabilize  
177 the assemblage structure and exclude some species. This initial increase in species  
178 abundance/diversity followed by subsequent community turnover and change in species  
179 interactions is a trend of recovery through time observed in many terrestrial and aquatic  
180 ecosystems<sup>32,33,34</sup>. In fact, ecosystem complexity and recovery are attained following build-up  
181 of species abundance and richness, community turnover, and meta-community  
182 interactions<sup>11,12,13</sup>. Therefore, while restoration can be effective in rapidly reducing the debt  
183 that accrues following destruction of coastal habitats, focusing monitoring on the initial years  
184 following restoration will overestimate the trajectory towards recovery<sup>35</sup>.

185

186 The recovery of diversity of oyster habitat-associated fish and invertebrates was slower than  
187 that of abundance (~36% and ~24% recovery debt, respectively). This differs from the previous  
188 estimates from most ecosystems whereby overall recovery debt in diversity is generally higher

189 than that of abundance<sup>13</sup>. The trajectory of recovery in abundance and diversity tend to differ  
190 in ecosystems depending on the type of restoration practice (active vs. passive restoration) by  
191 either driving rapid abundance of opportunistic colonisers or slow progression in community  
192 turnover<sup>36</sup>. For example, in the terrestrial realm, active landscape restoration (e.g., tree  
193 planting) tends to increase faunal abundance faster than diversity because of the sudden change  
194 in habitat structure which can be rapidly exploited by few species (e.g., forest specialists<sup>34,36</sup>).  
195 On the other hand, similar barren landscapes undergoing passive recovery will experience  
196 progressive community turnover from an open-field community to a forest species dominated  
197 community as the habitat setting gradually changes<sup>36</sup>. Comparable trends have been recorded  
198 in active mangrove restoration whereby abundance of algivorous fish species peak after  
199 restoration, but overall fish diversity remains low<sup>37</sup>. While the progression in recovery of  
200 abundance and diversity of organisms have not been contrasted between passive or active  
201 restoration efforts in multiple marine habitats, our results suggest a fast increase of abundance  
202 of some species in restored oyster habitats, where active restoration by substrate provision is  
203 generally unavoidable.

204

205 It is likely that attraction of mobile fauna from adjacent habitats to the more structurally  
206 complex restored habitats, rather than purely enhanced recruitment, accounts for some of this  
207 rapid increase in faunal abundance<sup>38,39</sup>. Interestingly, 25% of restored sites we assessed gained  
208 higher abundance than their reference sites (remnant habitats). As the remnant habitats  
209 themselves are likely to have experienced some extent of change since industrial overfishing  
210 began in the 19<sup>th</sup> century (shifting baselines), this higher abundance is likely to be, at least  
211 partly, reflective of somewhat disturbed remnant habitats. Unfortunately, the multigenerational  
212 exploitation and damage of marine systems means that we have lost most undisturbed  
213 “reference” baselines. Anecdotally, many of the ‘remnant habitats’ are actually reefs formed

214 from other human activities like abandoned benthic oyster farm infrastructure or even  
215 discarded rock ballast from early trade, making it largely impossible to quantify the degree of  
216 this past impact; effectively we cannot recreate the true historical baseline. Many of our  
217 estimates consider locations where nominally undisturbed remnant habitats were available for  
218 comparison with restored habitats, yet it is important to note that these locations form a very  
219 small proportion globally of the areas where habitats would have been historically<sup>15</sup>. In  
220 addition, the short duration of most monitoring programmes (2-6 years) means that it is not  
221 possible to quantify the time to full recovery. Nonetheless, our estimated recovery debt, along  
222 with the considerable decrease in the rate of recovery over time, suggest that an initial rapid  
223 partial recovery of oyster habitat associated fish and invertebrates is likely in restored habitats,  
224 but complete recovery for both abundance and diversity will require >10 years (Fig. 6).

225  
226 Irrespective of the accrued recovery debt, restoration efforts rapidly increase habitat function  
227 relative to unrestored sites. Restoration contributes to approximately double the abundance of  
228 fish and more than fivefold the abundance of invertebrates to coastal ecosystems over  
229 unrestored habitats. Such increases are promising in terms of recouping ecosystem services  
230 such as fisheries<sup>22,39,40</sup>. For example, multiple assessments grounded on the increase in habitat  
231 provisioning and nekton abundances show that restoration provides multiple prospects for  
232 fisheries<sup>22,41,42,43</sup>. Nonetheless, the general temporal progression of ecosystem recovery  
233 towards climax community composition through compositional turnover<sup>44</sup>, community/meta-  
234 community interactions, and broader ecosystem resilience and stability have to be accounted  
235 for when managing ecosystem recovery<sup>2,12,41</sup>. In this sense, complementing active restoration  
236 with adequate time and protection for the habitat to mature will further benefit recovery<sup>42</sup>.

237

238 While oyster habitat restoration is generally beneficial in terms of increased oyster density and  
239 oyster habitat associated biodiversity, not all restoration methods performed equally. First, we  
240 found that oyster shell was the best substrate for habitat building in terms of spat recruitment.  
241 However, oyster shells are not readily available in bulk for large scale restoration, may have  
242 biosecurity risks if not adequately weathered prior to use, may not provide sufficiently stable  
243 structure in wave-swept areas, and have high monetary costs<sup>43</sup>. We also advise caution with  
244 the use of other types of shells, as there is preliminary evidence that brittle or thin shells may  
245 break down rapidly and not form the structure which is key for spat recruitment and survival  
246 (e.g., the use of surf clam shell in Harris Creek, Chesapeake Bay<sup>44</sup>). As an alternative substrate  
247 when oyster shell is limited, limestone performed almost as well in terms of spat recruitment.  
248 In fact, the best performing restoration projects from our analysis (e.g., *C. virginica* reefs in the  
249 USA) used either oyster shell, limestone, or a mix of both as substrate for habitat  
250 building<sup>28,29,30,31,49</sup>. Secondly, our finding that live oyster density is maximised on habitats with  
251 structure more than 20-30 cm above the sediment reinforces current restoration practices<sup>50,51,52</sup>.  
252 Habitats with higher relief are more likely to avoid smothering of oysters by sedimentation and  
253 elevate oysters above seasonally hypoxic bottom waters thereby increasing survival of spat and  
254 adults<sup>51,53</sup>. The maximum relief of habitats above the sediment will be defined by water depth  
255 and tidal range, especially for intertidal habitats. Such intertidal habitats will expand laterally,  
256 gaining surface area rather than height, while subtidal habitats have the potential for both lateral  
257 and vertical growth. Irrespective of whether restoration is inter- or subtidal, however, we  
258 demonstrate that greatest success is achieved when the restoration substrate is sufficiently  
259 above the sediment, providing refined guidance for restoration planning.

260

261 Overall, we demonstrate that active restoration of oyster habitats provides enormous benefits  
262 to the recovery of associated faunal diversity and abundance (Fig.4). Our measurement of

263 recovery debt post-restoration highlights that recovery of degraded oyster habitats to a  
264 reference state is a long-term process and will also benefit from elimination of any external  
265 disturbance (e.g., protection from oyster harvest). In addition, ecosystems require time to  
266 develop a stable and resilient community structure following active structural restoration.  
267 Nonetheless, implementing the appropriate restoration methods has the potential to boost  
268 recovery rate, improve overall outcomes, and maximise return for effort. It must be noted that,  
269 currently, monitoring of restored habitats is generally done for < 5 years post-restoration,  
270 capturing the initial boost in recovery but not the subsequent progressive change in community  
271 composition that remains integral to regaining full ecosystem complexity<sup>12</sup>. Refining our  
272 understanding of the capacity of restored habitats to recover full functions and services will  
273 require longer-term monitoring, even more so in areas where remnant reference reefs are not  
274 present as maximum recovery in such habitats will only likely be indicated by long-term  
275 maintenance of ecosystem complexity and stability. From a different perspective, we bring into  
276 focus that the actions to offset or mitigate the damage caused by coastal development may be  
277 inadequate and the prospect of future sustainable development should be weighed up against  
278 not just the instantaneous loss of ecosystem function and services, but the potential for  
279 generational loss as has been the case for oyster habitats. Overall, by integrating an estimation  
280 of oyster habitat recovery with an assessment of the most effective restoration methods we  
281 show that, globally, biodiversity and abundance benefit immensely from oyster habitat  
282 restoration and the recovery completeness will progressively increase on potentially decadal  
283 scales.

284

285

286 **Methods**

287 **Literature search**

288 Our analysis followed the PRISMA (Preferred Reporting Items for Systematic Reviews and  
289 Meta-Analyses) and the CEE (Collaboration for Environmental Evidence) guidelines. We  
290 aggregated studies targeting oyster habitat restoration by using the search terms (("oyster reef"  
291 OR "oyster habitat" OR "oyster bed") AND ("restoration" OR "recovery" OR "rehabilitation"  
292 OR "substrate" OR "relief" OR "biodiversity" OR "species richness" OR "abundance" OR  
293 "living shoreline" OR "community" OR "epifauna" OR "nekton")) from three databases:  
294 Google Scholar, Scopus and Web of Science. Study identification was terminated on the 29<sup>th</sup>  
295 of September 2021 (range: 1970 to 29<sup>th</sup> September 2021) and only peer-reviewed journal  
296 articles and dissertations were included in our study. Also, we used species abundance and  
297 diversity for recovery debt and rate calculations as few papers documented how other  
298 parameters (e.g. filtration, wave attenuation) changed post restoration compared to a remnant  
299 site (low sample size). Our initial literature search yielded 12,128 papers. After removal of  
300 duplicates and studies that were out of context, 1,374 papers remained (Primary screening;  
301 Supplementary File 1). We then screened these papers to identify those that were specifically  
302 relevant to oyster restoration projects. The majority of studies (~73%) and sites focusing on  
303 oyster habitat restoration were situated in the east coast of North America (Fig. S1 and S2).

304

305 **Selection criteria**

306 We removed duplicate papers and manually screened the titles and abstracts of each study to  
307 select studies that explicitly targeted oyster habitat restoration. We included all papers that  
308 studied one or more of the following:

- 309 1. A measure of the resident or transient fish and invertebrates sampled in restored and  
310 remnant habitats (e.g., abundance, density, CPUE, species richness, diversity).
- 311 2. A measure of the resident or transient fish and invertebrates sampled in restored oyster  
312 habitats and degraded habitat (commonly represented as bare sediment).
- 313 3. A measure of oyster density in relation to oyster habitat vertical relief
- 314 4. A measure of recruitment on oyster shell and other substrata for restoration.

315 To be extracted and used in our analysis, studies had to report data either as mean/median with  
316 a measure of variance (e.g., SD or range) in tables or figures, or provide the full data set from  
317 which mean, and SD could be calculated. In the case a study reported data from multiple sites,  
318 each site was used as an individual data point. If a study reported two metrics that were of  
319 interest (e.g., diversity and abundance, or fish abundance and invertebrate abundance), each  
320 metric was analysed separately and as appropriate for our analysis. We only included data  
321 which were directly relevant to oyster habitat performance, excluding anything that could  
322 indirectly come from the influence of other types of habitats (e.g., adjacent marsh or  
323 mangroves). For example, if a study reported a metric from a control site, an oyster-only site  
324 and an oyster and seagrass site, we only use the data from the control and oyster-only sites.  
325 When studies reported data over shorter time intervals than yearly (e.g., monthly), we  
326 calculated a pooled annual mean and SD including each data point in our estimation to capture  
327 the whole range of response<sup>54</sup>. Based on the selection criteria for our research question, data  
328 were then extracted from 70 papers spanning sites worldwide (Supplementary Fig. 1). From  
329 these papers, a total of 232 data points were retrieved to estimate recovery debt in terms of  
330 biological diversity (n = 20 data points) and transient and resident fish and invertebrate  
331 abundance (n = 20), to analyse difference in fish and invertebrate abundance between restored  
332 and unrestored habitats (n = 76), estimate the influence of different substrates on oyster spat  
333 recruitment (n = 90), and estimate the influence of vertical relief on oyster density (n = 26).

334 Data for analysis were extracted from figures using PlotDigitizer for windows, or from tables  
335 and text.

336

### 337 **Calculating recovery debt and recovery rate**

338 Recovery debt was calculated following<sup>13</sup>. In brief, we screened all studies that reported an  
339 outcome metric that was either species richness, diversity index, species density, or species  
340 abundances. Here we used overall organism diversity or abundance (combining fish and  
341 invertebrates) linked to reef restoration to obtain the best estimate of overall recovery debt for  
342 each reef. For recovery rate and debt calculations we only used data from studies that included  
343 the outcome metrics (e.g., abundance and diversity metrics) from before restoration and after  
344 restoration (no matter the time post restoration), at the restoration and a reference remnant site.  
345 Recovery debt in terms of diversity (including metrics representing the number of species  
346 utilising a site, e.g., species richness and diversity) and abundance (including metrics  
347 representing an estimate of the number of individuals within a site, e.g., abundances, CPUE  
348 and density) were then separately calculated using the following equations:

349 (1)  $RD = X_r T - [(1/r) * (X_e - X_s)]$

350 (2)  $RD_t = X_r - [(1/rT) * (X_e - X_s)]$

351 (3)  $RDr(\%) = 100 * (X_r / RD_t)$ ,

352 where, RD is the estimated graphical area of recovery debt (Fig. 1) for the time period where  
353 monitoring took place, RD<sub>t</sub> is the of recovery debt per annum, and RDr(%) is the estimated  
354 percentage recovery debt per annum. X<sub>r</sub> is the outcome metric of the reference site (either in  
355 the pre-disturbance state or a current undisturbed reference site), X<sub>e</sub> is the outcome metric (e.g.,  
356 abundance or diversity) after restoration (at time t = T), X<sub>s</sub> is the outcome metric prior to  
357 restoration (at time t = 0) and r is a constant ( $[1/T] * \ln [X_e/X_s]$ ). In the case where either X<sub>e</sub>



358 or  $X_s$  were zero, we replaced zero by a value in the same order of magnitude as  $X_s$  or  $X_e$  in the  
359 median magnitude (e.g., 0.5, 5, 50) (see Moreno-Mateos et al. 2017<sup>13</sup>). Recovery rate per  
360 annum was calculated following Jones et al., (2018)<sup>11</sup> using the following equation:

$$361 \text{ Recovery rate} = 100 * (X_e - X_s) / (X_f - X_s) / \text{Time.}$$

362

### 363 **Estimating difference between restored and unrestored habitats**

364 To (1) estimate the difference in fish or invertebrate diversity and abundance between restored  
365 and unrestored habitats at various time-points post restoration, (2) assess differences in oyster  
366 recruitment between shell and alternate substrata, and (3) to test for the influence of relief on  
367 oyster density (by comparing adult oyster density at different reef relief), we calculated the  
368 effect size of response variables (spat density, oyster density, diversity, or abundances) by  
369 using means, standard deviations (SD), and sample sizes extracted from studies<sup>55</sup>. We selected  
370 to use log response ratio (LnRR) as effect size because of its capacity to detect true effects  
371 (expected value of the log-proportional change between two independent and normally  
372 distributed populations) and robustness to small sample sizes<sup>56</sup>. LnRR was calculated using the  
373 following equation:

$$374 \text{ LnRR} = \ln(\text{Mean}_E / \text{Mean}_C),$$

375 where  $\text{Mean}_E$  is the mean of experimental measure (e.g., number of spat on alternate substrate  
376 or adult oyster density on reef over 10 cm above sediment) and  $\text{Mean}_C$  treatment is the control  
377 measure (e.g. number of spat on shell or adult oyster density on reef below 10 cm on sediment).  
378 If one of the measures was zero, to avoid computational error we used a correction proportional  
379 to the reciprocal of the value of the contrasting measure (e.g: value = N, reciprocal = 1/N).  
380 When variance was reported as standard error (SE) we calculated SD as:

381  $SD = SE * \sqrt{N}$

382 where  $N$  is the sample size. When median and ranges were reported, means and standard  
383 deviation were calculated as per Hozo et al. (2005)<sup>57</sup> with the following equations:

384 
$$\text{Mean} = (a + 2m + b) / 4$$

385 where  $a$  is the lower range,  $b$  is the upper range, and  $m$  is the median,

386 
$$SD = (1/12) \left\{ (a - 2m + b)^2 / 4 + (b - a)^2 \right\}$$

387 for  $N < 15$ , where  $a$  is the lower range,  $b$  is the upper range, and  $m$  is the median and

388 
$$SD = \text{Range} / 4$$

389 for  $N > 15$ . Prior to formal statistical analyses, we tested for publication bias using a Rosenberg  
390 fail-safe test, Egger's regression test and trimfill method. Publication bias arises if studies with  
391 non-significant effects are not published<sup>58</sup> and are thus excluded in analysis, thereby  
392 influencing results and interpretation. The Rosenberg fail-safe test calculates the number of  
393 studies with non-significant effects (effect size of zero) that would be required to change the  
394 results of the meta-analysis from significant to non-significant (Rosenberg 2005). The  
395 Rosenberg fail-safe numbers calculated in our analysis were larger than  $5n + 10$ , where  $n$  is the  
396 number of studies included in the analysis<sup>58</sup> and observed significance lower than 0.05 The  
397 Egger's regression tests were used to estimate asymmetry in funnel plots and any asymmetry  
398 was adjusted using the trimfill method. For all data, either the regression tests resulted in  
399 significance values above 0.05 or the trimfill method did not change the mean effect size  
400 estimations (Supplementary File 3). Therefore, publication bias was unlikely to affect our  
401 results. Following publication bias tests, we used a weighed Random-Effects model (restricted  
402 maximum likelihood) to undertake our meta-analyses, including heterogeneity test ( $Q$ ) that  
403 indicates the percentage variation between studies due to heterogeneity (i.e., differences in  
404 outcomes between different studies; also denoted as  $I^2$ ) rather than chance<sup>59</sup>. We then

405 performed meta-regressions using Mixed-Effects models to analyse variation in effect sizes  
406 (e.g., relationship between nekton abundance effect sizes with time post restoration). All  
407 calculation of effect sizes, publication bias tests, meta-analysis, and meta-regressions were  
408 performed on Meta-Essentials 1.5<sup>60</sup> and OpenMEE, which is an open-source software  
409 specifically designed for meta-analysis in ecology and evolutionary biology and based on the  
410 “metafor” and “ape” packages for R (Wallace et al. 2017).

411

#### 412 **Data availability**

413 Data will be made publicly available on the University data portal (DOI will be assigned on  
414 publication).

415

#### 416 **Acknowledgements**

417 This project was funded by a University of Hong Kong Post-Doctoral Fellowship to DAH and  
418 an Environment and Conservation Fund Hong Kong grant (ECF106/2019), a Faculty of  
419 Science (HKU) Rising Star Fund to BDR, and an ARC Linkage Grant (LP180100732) to MJB.

420

421

422

## 423 References

- 424 1. Lowe, A., Boshier, D., Ward, M., Bacles, C. & Navarro, C. Genetic resource impacts  
425 of habitat loss and degradation; reconciling empirical evidence and predicted theory for  
426 neotropical trees. *Heredity* **95**, 255-273 (2005).
- 427 2. Duarte, C. M. *et al.* Rebuilding marine life. *Nature* **580**, 39-51 (2020).
- 428 3. Banks, S. C. *et al.* How does ecological disturbance influence genetic diversity? *Trends*  
429 *Ecol. Evol.* **28**, 670-679 (2013).
- 430 4. De Groot, R. S. *et al.* Benefits of investing in ecosystem restoration. *Conserv. Biol.* **27**,  
431 1286-1293 (2013).
- 432 5. Bayraktarov, E. *et al.* The cost and feasibility of marine coastal restoration. *Ecol. Appl.*  
433 **26**, 1055-1074 (2016).
- 434 6. Knoche, S. *et al.* Estimating Ecological Benefits and Socio-Economic Impacts from  
435 Oyster Reef Restoration in the Choptank River Complex, Chesapeake Bay. (2020).
- 436 7. Waltham, N.J. *et al.* UN Decade on Ecosystem Restoration 2021–2030—what chance  
437 for success in restoring coastal ecosystems?. *Front. Mar. Sci* **7**, 71 (2020)
- 438
- 439 8. Benayas, J. M. R., Newton, A. C., Diaz, A. & Bullock, J. M. Enhancement of  
440 biodiversity and ecosystem services by ecological restoration: a meta-analysis. *Science*  
441 **325**, 1121-1124 (2009).
- 442
- 443 9. Bradbury, R. B. *et al.* The economic consequences of conserving or restoring sites for  
444 nature. *Nat. Sustain* **4**, 1-7 (2021).
- 445 10. Gann, G. D. *et al.* International principles and standards for the practice of ecological  
446 restoration. *Restor. Ecol* **27**, S1-S46 (2019).
- 447 11. Jones, H. P. *et al.* Restoration and repair of Earth’s damaged ecosystems. *Proceedings*  
448 *of the Royal Society B: Biological Sciences* **285**, 20172577 (2018).
- 449 12. Moreno-Mateos, D. *et al.* The long-term restoration of ecosystem complexity. *Nature*  
450 *Ecol. Evol.* **4**, 676-685 (2020).
- 451 13. Moreno-Mateos, D. *et al.* Anthropogenic ecosystem disturbance and the recovery debt.  
452 *Nat. comm.* **8**, 1-6 (2017).
- 453 14. McCay, D. F. Development and application of damage assessment modelling: example  
454 assessment for the North Cape oil spill. *Mar. Pollut. Bull.* **47**, 341-359 (2003).

- 455 15. Beck, M. W. *et al.* Oyster reefs at risk and recommendations for conservation,  
456 restoration, and management. *Bioscience* **61**, 107-116 (2011).
- 457 16. Hesterberg, S. G. *et al.* Prehistoric baseline reveals substantial decline of oyster reef  
458 condition in a Gulf of Mexico conservation priority area. *Biol. Lett.* **16**, 20190865  
459 (2020).
- 460 17. Bersosa Hernández, A. *et al.* Restoring the eastern oyster: how much progress has  
461 been made in 53 years? *Front. Ecol. Env.* **16**, 463-471 (2018).
- 462 18. McAfee, D., McLeod, I. M., Boström-Einarsson, L. & Gillies, C. L. The value and  
463 opportunity of restoring Australia's lost rock oyster reefs. *Restor. Ecol.* **28**, 304-314  
464 (2020).
- 465 19. Grabowski, J. H. *et al.* Economic valuation of ecosystem services provided by oyster  
466 reefs. *Bioscience* **62**, 900-909 (2012).
- 467 20. La Peyre, M. K., Humphries, A. T., Casas, S. M. & La Peyre, J. F. Temporal variation  
468 in development of ecosystem services from oyster reef restoration. *Ecol Eng.* **63**, 34-  
469 44 (2014).
- 470 21. Zu Ermgassen, P. S. *et al.* Forty questions of importance to the policy and practice of  
471 native oyster reef restoration in Europe. *Aquat. Conserv.* **30**, 2038-2049 (2020).
- 472 22. Zu Ermgassen, P. S. *et al.* Estimating and applying fish and invertebrate density and  
473 production enhancement from seagrass, salt marsh edge, and oyster reef nursery  
474 habitats in the Gulf of Mexico. *Estuaries. Coast.* **44**, 1-16 (2021).
- 475 23. Fitzsimons, J.A. *et al.* Restoring shellfish reefs: Global guidelines for practitioners  
476 and scientists. *Conserv. Sci. Prac.* **2**, 1-11(2020).
- 477 24. Howie, A.H. & Bishop, M.J. Contemporary oyster reef restoration: responding to a  
478 changing world. *Front. Ecol. Evol.* **9** (2021).
- 479 25. Alleway, H.K., & Connell, S.D. Loss of an ecological baseline through the  
480 eradication of oyster reefs from coastal ecosystems and human memory. *Conserv.*  
481 *Biol.* **29**, 795-804 (2015).
- 482 26. Thurstan, R.H. & Roberts, C.M., Ecological Meltdown in the Firth of Clyde,  
483 Scotland: Two Centuries of Change in a Coastal Marine Ecosystem. *PloS ONE* **5**,  
484 e11767 (2010).
- 485 27. Zu Ermgassen, P.S.E. *et al.* Historical ecology with real numbers: Past and present  
486 extent and biomass of an imperilled estuarine ecosystem. *Proc. Royal Soc. B* **279**,  
487 3393-3400 (2012).

- 488 28. Thomas, G., Lorenz, A.W., Sundermann, A., Haase, P., Peter, A. & Stoll, S. Fish  
489 community responses and the temporal dynamics of recovery following river habitat  
490 restorations in Europe. *Freshw. Sci.*, **34**, 975-990 (2015).
- 491 29. Graham, S.E. & Quinn, J.M. Community turnover provides insight into variable  
492 invertebrate recovery between restored streams with different integrated catchment  
493 management plans. *N. Z. J. Mar. Freshwater Res.* **54**, 467-489 (2020).
- 494 30. Díaz-García JM, López-Barrera F, Pineda E, Toledo-Aceves T, & Andresen E.  
495 Comparing the success of active and passive restoration in a tropical cloud forest  
496 landscape: A multi-taxa fauna approach. *PloS one*. **15**, e0242020 (2020).
- 497 31. Bishop MJ, Vozzo ML, Mayer-Pinto MM, & Dafforn KA. Complexity-biodiversity  
498 relationships on marine urban structures: reintroducing habitat heterogeneity through  
499 eco-engineering. *Phil Trans Royal Soc B*. (In press)
- 500 32. Meli, P., Holl, K.D., Rey Benayas, J.M., Jones, H.P., Jones, P.C., Montoya, D. &  
501 Moreno Mateos, D. A global review of past land use, climate, and active vs. passive  
502 restoration effects on forest recovery. *Plos one*. **12**, e0171368 (2017).
- 503 33. Ram, M.A., Caughlin, T.T. &Roopsind, A. Active restoration leads to rapid recovery  
504 of aboveground biomass but limited recovery of fish diversity in planted mangrove  
505 forests of the North Brazil Shelf. *Restor. Ecol.* **29**, e13400 (2021).
- 506 34. Powers, S.P., Grabowski, J.H., Peterson, C.H. & Lindberg, W.J. Estimating  
507 enhancement of fish production by offshore artificial reefs: uncertainty exhibited by  
508 divergent scenarios. *Mar. Ecol. Prog. Ser.* **264**, 265-277 (2003).
- 509 35. Gilby, B.L. *et al.* Maximizing the benefits of oyster reef restoration for finfish and  
510 their fisheries. *Fish. Fish.*, **19**, 931-947 (2018).
- 511 36. Humphries, A. T. & La Peyre, M. K. Oyster reef restoration supports increased nekton  
512 biomass and potential commercial fishery value. *PeerJ* **3**, e1111 (2015).
- 513 37. Harding, J.M. & Mann, R.L. Oyster reefs as fish habitat: opportunistic use of restored  
514 reefs by transient fishes. *J. Shellfish. Res.*, **20**, p.951-959 (2001).
- 515 38. Stunz, G. W., Minello, T. J. & Rozas, L. P. Relative value of oyster reef as habitat for  
516 estuarine nekton in Galveston Bay, Texas. *Marine Ecology Progress Series* **406**, 147-  
517 159 (2010).
- 518 39. De Santiago, K., Palmer, T. A., Dumesnil, M. & Pollack, J. B. Rapid development of a  
519 restored oyster reef facilitates habitat provision for estuarine fauna. *Restoration*  
520 *Ecology* **27**, 870-880 (2019).

- 521 40. Rezek, R.J., Lebreton, B., Roark, E.B., Palmer, T.A. & Pollack, J.B. How does a  
522 restored oyster reef develop? An assessment based on stable isotopes and community  
523 metrics. *Mar. Biol.* **164**, 54 (2017).
- 524 41. Hallett, L.M. *et al.* Do we practice what we preach? Goal setting for ecological  
525 restoration. *Restor. Ecol.*, **21**, 312-319 (2013).
- 526 42. Jacob, C., Buffard, A., Pioch, S. & Thorin, S. Marine ecosystem restoration and  
527 biodiversity offset. *Ecol. Eng.* **120**, 585-594 (2018).
- 528 43. Goelz, T., Vogt, B. & Hartley, T. Alternative substrates used for oyster reef restoration:  
529 a review. *Journal of Shellfish Research* **39**, 1-12 (2020).
- 530 44. US Army Corp of Engineers (USACE). 2012. Chesapeake Bay oyster recovery: Native  
531 oyster restoration master plan. *Maryland and Virginia, U.S. Army Corps of Engineers*  
532 *Baltimore and Norfolk Districts*
- 533 45. Meyer, D. L. & Townsend, E. C. Faunal utilization of created intertidal eastern oyster  
534 (*Crassostrea virginica*) reefs in the southeastern United States. *Estuaries* **23**, 34-45  
535 (2000).
- 536 46. Harwell, H. D., Posey, M. H. & Alphin, T. D. Landscape aspects of oyster reefs: effects  
537 of fragmentation on habitat utilization. *Journal of Experimental Marine Biology and*  
538 *Ecology* **409**, 30-41 (2011).
- 539 47. Keller, D. A. *et al.* Salt marsh shoreline geomorphology influences the success of  
540 restored oyster reefs and use by associated fauna. *Restoration Ecology* **27**, 1429-1441  
541 (2019).
- 542 48. Humphries, A. T., La Peyre, M. K., Kimball, M. E. & Rozas, L. P. Testing the effect  
543 of habitat structure and complexity on nekton assemblages using experimental oyster  
544 reefs. *Journal of Experimental Marine Biology and Ecology* **409**, 172-179 (2011).
- 545 49. Kingsley-Smith, P. R. *et al.* Habitat use of intertidal eastern oyster (*Crassostrea*  
546 *virginica*) reefs by nekton in South Carolina estuaries. *Journal of Shellfish Research*  
547 **31**, 1009-1021 (2012).
- 548 50. Schulte, D. M., Burke, R. P. & Lipcius, R. N. Unprecedented restoration of a native  
549 oyster metapopulation. *Science* **325**, 1124-1128 (2009).
- 550 51. Colden, A. M., Latour, R. J. & Lipcius, R. N. Reef height drives threshold dynamics of  
551 restored oyster reefs. *Marine Ecology Progress Series* **582**, 1-13 (2017).
- 552 52. Theuerkauf, S. J. & Lipcius, R. N. Quantitative validation of a habitat suitability index  
553 for oyster restoration. *Frontiers in Marine Science* **3**, 64 (2016).



- 554 53. Lenihan, H. S. *et al.* Cascading of habitat degradation: oyster reefs invaded by refugee  
555 fishes escaping stress. *Ecological Applications* **11**, 764-782 (2001).
- 556 54. Ray, N.E. and Fulweiler, R.W. Meta-analysis of oyster impacts on coastal  
557 biogeochemistry. *Nat. Sust.* **4**, 261-269 (2021).
- 558 55. Hedges, L. V., Gurevitch, J. & Curtis, P. S. The meta-analysis of response ratios in  
559 experimental ecology. *Ecology* **80**, 1150-1156 (1999).
- 560 56. Lajeunesse, M. J. & Forbes, M. R. Variable reporting and quantitative reviews: a  
561 comparison of three meta-analytical techniques. *Ecol. Lett.* **6**, 448-454 (2003).
- 562 57. Hozo, S. P., Djulbegovic, B. & Hozo, I. Estimating the mean and variance from the  
563 median, range, and the size of a sample. *BMC medical research methodology* **5**, 1-10  
564 (2005).
- 565 58. Rosenberg, M. S. The file-drawer problem revisited: a general weighted method for  
566 calculating fail-safe numbers in meta-analysis. *Evolution* **59**, 464-468 (2005).
- 567 59. Wallace, B. C. *et al.* Open MEE: Intuitive, open-source software for meta-analysis in  
568 ecology and evolutionary biology. *Methods in Ecology and Evolution* **8**, 941-947  
569 (2017).
- 570 60. Suurmond, R., van Rhee, H. & Hak, T. Introduction, comparison, and validation of  
571 Meta-Essentials: a free and simple tool for meta-analysis. *Research synthesis methods*  
572 **8**, 537-553 (2017).

573

574



575 **Fig. 1**

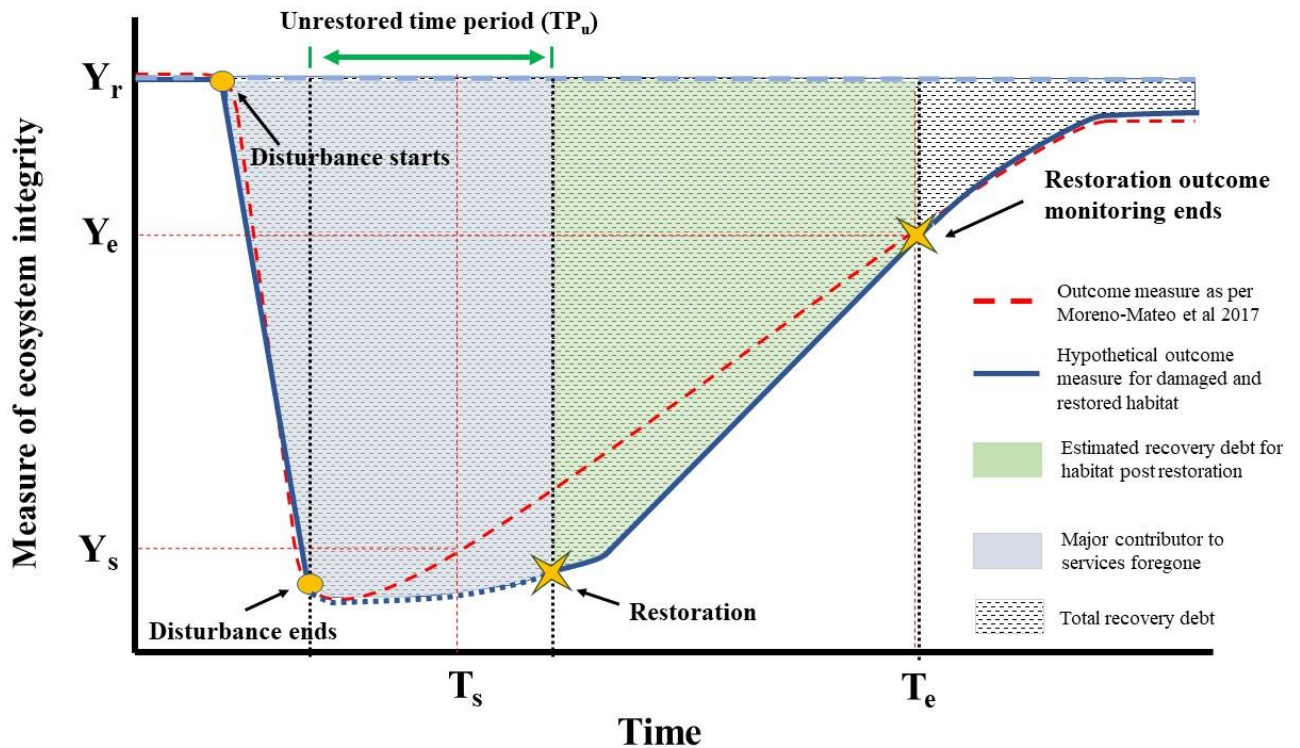

576

577

578 **Fig. 1: Theoretical diagram of general recovery debt (red dotted line) and recovery debt**  
579 **specific to restored habitats (blue lines).**

580  $TP_u$  reflects the ecosystem integrity in the absence of restoration efforts  $Y_s$  and  $T_s$  represent  
581 ecosystem integrity outcome measure and time when measurement started.  $Y_e$  and  $T_e$  represent  
582 ecosystem integrity outcome measure and time when measurement ended. Pale blue dotted line  
583 ( $Y_r$ ) represents ecosystem integrity outcome measure of reference site. Note that Time (x-axis)  
584 is not to scale and the unrestored time period ( $TP_u$ ) from when disturbance stopped to  
585 restoration could be 20 – 50-fold longer than the post-restoration period; in some cases,  $TP_u$   
586 can be over 100 years. Figure modified from Moreno-Mateos et al. (2017).

587

588

589 **Fig. 2**

590

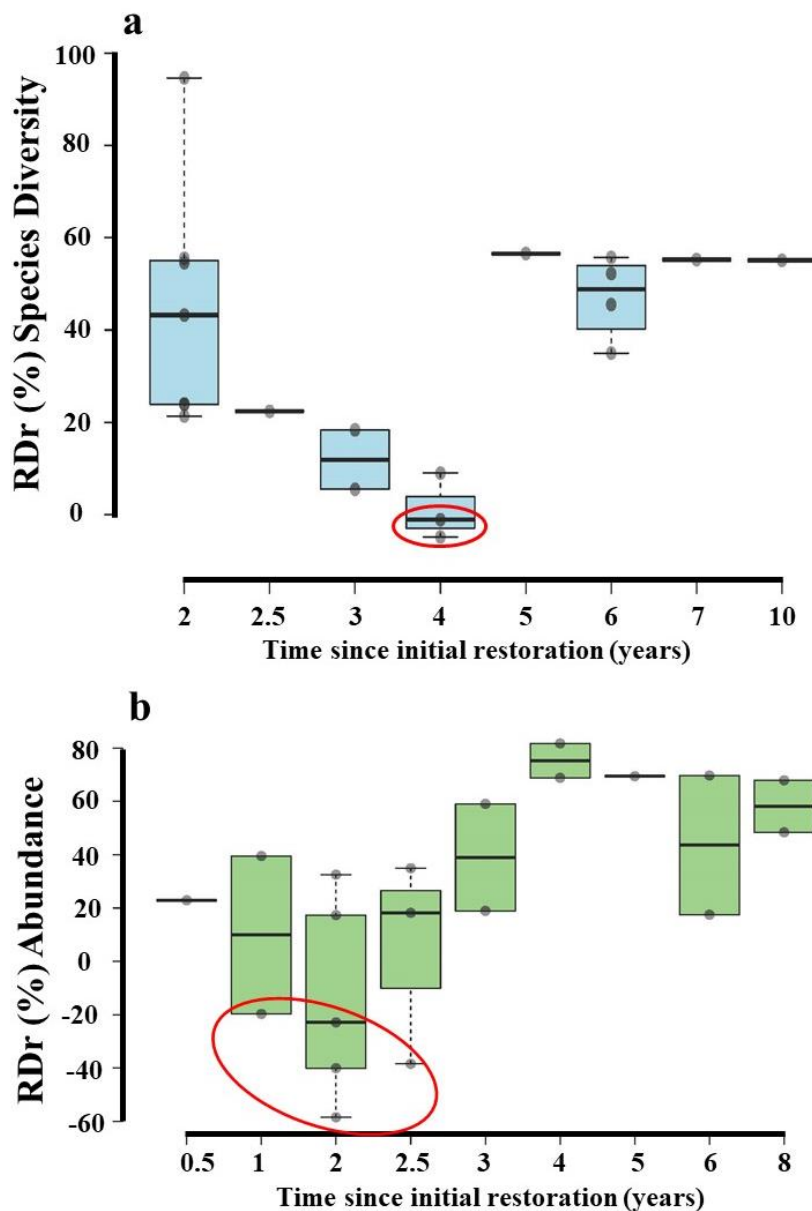

591

592 **Fig. 2. Oyster habitat accumulated recovery debt per annum as a function of time since**  
593 **restoration.**

594 **a-b** Recovery debt calculated from diversity (a) and abundance (b) (n = 20 sites for each).  
595 Accumulated debt declines initially with rapid recovery following restoration, but then begins  
596 to increase as recovery slows and debt begins to accumulate again. Black dots represent  
597 estimated recovery debt data points. Black lines represent median recovery debt. Box limits  
598 represent 25<sup>th</sup> and 75<sup>th</sup> percentile. Note the different scales of each graph. Red circles represent  
599 data points extracted from studies that used limestone, oyster shell or a combination of both as  
600 substrate for habitat building<sup>28,29,30</sup>.

601 **Fig. 3**

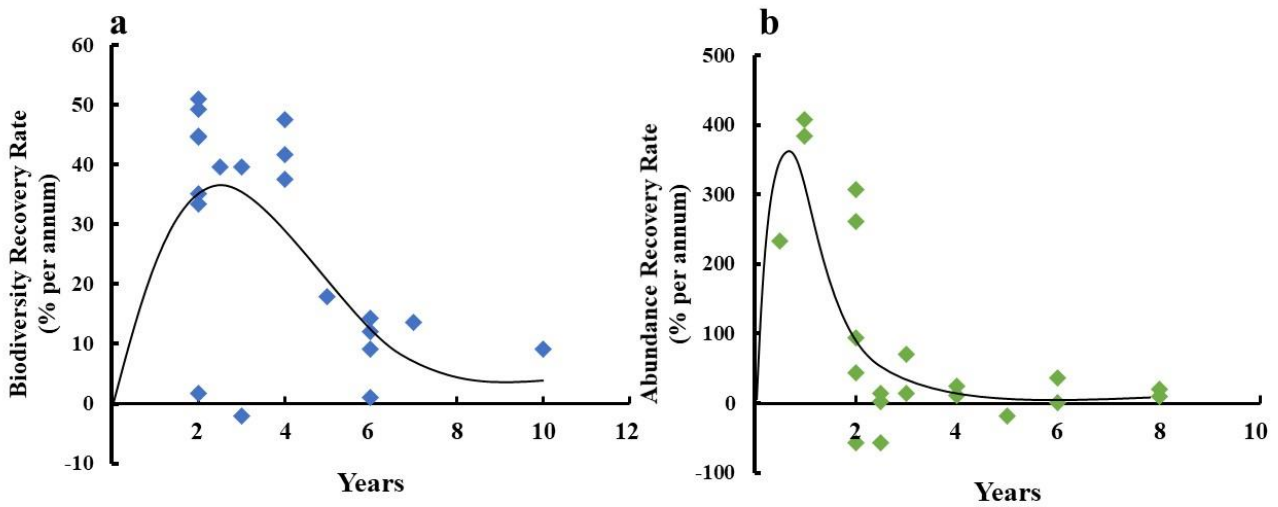

602

603 **Fig. 3. Oyster habitat recovery rates against time of monitoring.**

604 **a-b** calculated recovery rate using fish and invertebrate diversity (a) and abundance (b). Note  
605 the different scales for diversity and abundance indicating that abundance has much more rapid  
606 recovery than diversity. The black lines represent a smoothed quadratic model with intercept  
607 set at 0. Recovery rates are calculated in relation to a reference remnant site.

608

609 **Fig. 4**

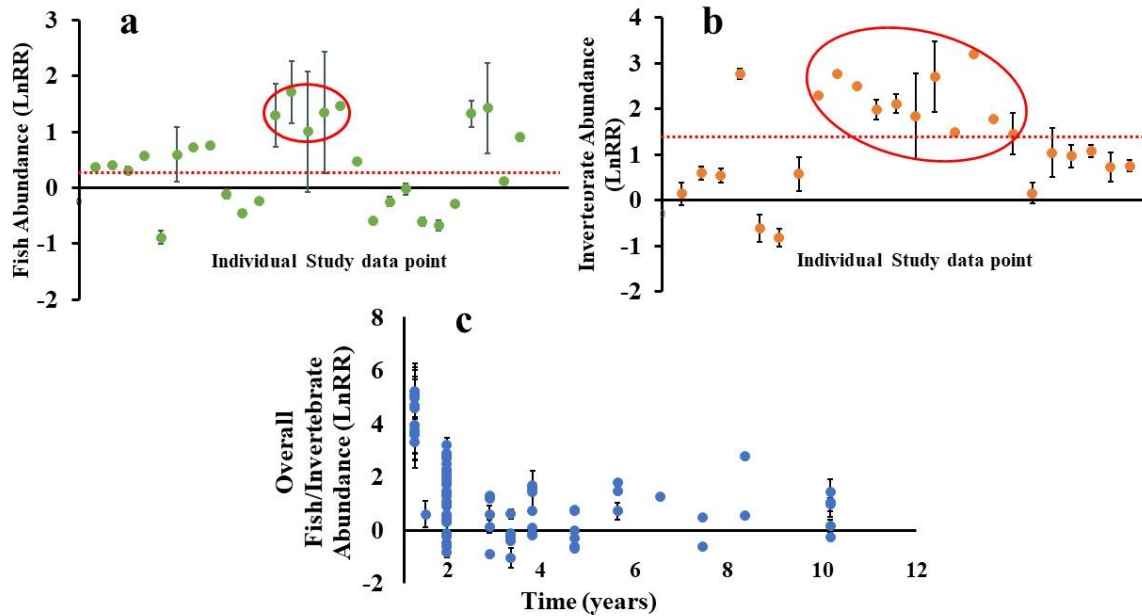

610

611 **Fig. 4. Inverted forest plots representing effect size for increase or decrease in transient**  
612 **and resident fish and invertebrate relative to unrestored habitats.**

613 **a-b** Change in fish (a) and invertebrate (b) abundance in restored oyster habitats compared to  
614 bare sediment. Data points = effect sizes (LnRR). X-axes in graphs (a) and (b) only represents  
615 distribution of data points. Red dotted line represents overall mean effect size. Red circles  
616 represent data points extracted from studies that used limestone, oyster shell or both as substrate  
617 for habitat building<sup>29,31,49</sup>.

618 **c** Overall abundance of oyster habitat associated fauna remains higher than that of bare  
619 sediment over time. Error bars = 95% CI. Data points without visible error bars are due to very  
620 small CI.

621

622 **Fig. 5**

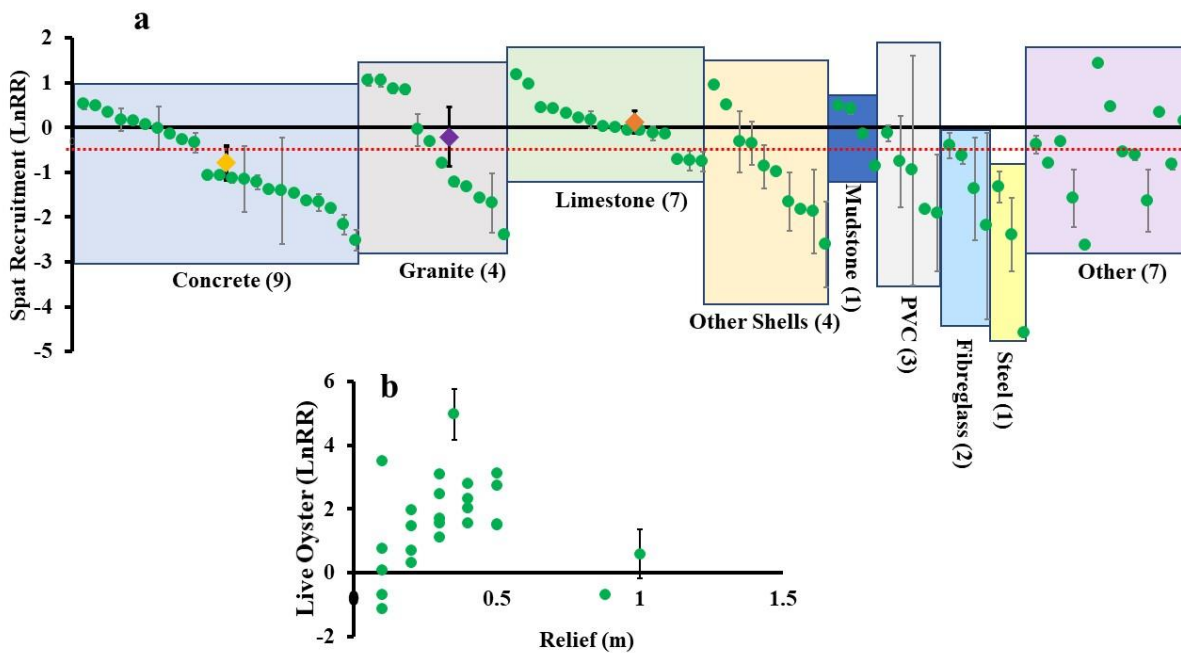

6\_\_

624 **Fig. 5. Inverted forest plot representing difference in overall spat settlement and oyster**  
625 **density.**

626 **a-b** Spat settlement on alternative substrata compared to oyster shell (a) and change in live  
627 oyster density on oyster habitats as a function of vertical relief above the sediment (b). Data  
628 points = effect size (LnRR). Error bars = 95% CI. Data points without visible error bars are due  
629 to very small CI. Yellow, purple, and orange diamonds represent the mean effect sizes for  
630 concrete, granite, and limestone, respectively. Red dotted line represents overall mean effect  
631 size for all alternative substrata compared to using oyster shells. Numbers in parentheses  
632 represent the number of papers from which the data points were taken.

633

634 **Fig. 6**

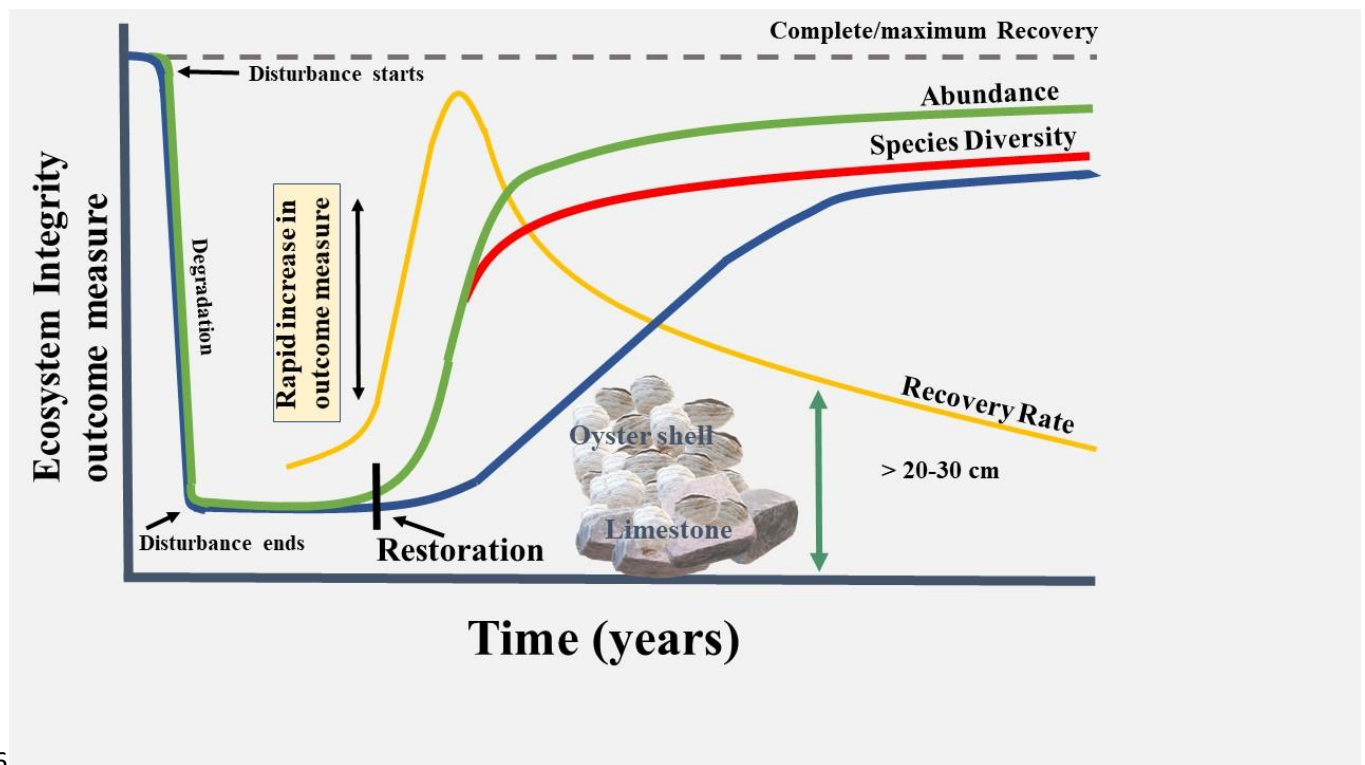

636 **Fig. 6. Model of oyster habitat recovery following disturbance and subsequent**  
637 **restoration.**

638 Trends are based on analysis of change in overall recovery of oyster habitat (blue line),  
639 cumulative species diversity (red line) and cumulative abundance (green line) of associated  
640 species. Note the initial rapid recovery rates post-restoration (yellow line) which then declines  
641 over time.

642
